RESEARCH ARTICLE

# Predicting severe stunting and its determinants among under-five in Eastern African Countries: A machine learning algorithms

Halid Worku Jemil<sup>1\*</sup>, Sonia Worku Semayneh<sup>2</sup>, Altaseb Beyene Kassaw<sup>3</sup>, Kassahun Dessie Gashu<sup>4</sup>

**1** Department of Health Informatics, College of Medicine and Health Science, Wollo University, Dessie, Ethiopia, **2** Department of Oncology, Addis Ababa University College of Health Science, Tikur Anbessa Specialized Hospital, Addis Ababa University, Addis Ababa, Ethiopia, **3** Department of Biomedical Science, College of Medicine and Health Science, Wollo University, Dessie, Ethiopia, **4** Department of Health Informatics, College of Medicine and Health Science, Gondar University, Gondar, Ethiopia

\* [halidworku288@gmail.com](mailto:halidworku288@gmail.com)

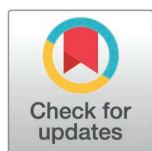

## OPEN ACCESS

**Citation:** Jemil HW, Semayneh SW, Kassaw AB, Gashu KD (2026) Predicting severe stunting and its determinants among under-five in Eastern African Countries: A machine learning algorithms. PLoS One 21(1): e0340221. <https://doi.org/10.1371/journal.pone.0340221>

**Editor:** Olutosin Ademola Otekunrin, Federal University of Agriculture Abeokuta, NIGERIA

**Received:** July 27, 2025

**Accepted:** December 17, 2025

**Published:** January 2, 2026

**Peer Review History:** PLOS recognizes the benefits of transparency in the peer review process; therefore, we enable the publication of all of the content of peer review and author responses alongside final, published articles. The editorial history of this article is available here: <https://doi.org/10.1371/journal.pone.0340221>

**Copyright:** © 2026 Jemil et al. This is an open access article distributed under the terms of the [Creative Commons Attribution License](https://creativecommons.org/licenses/by/4.0/), which permits unrestricted use, distribution,

## Abstract

### Introduction

Severe stunting is one of the primary public health challenges in LMIC including Eastern African Countries, which affects millions of children. In addition, it was a major contributor for mortality and related complication of children aged under five. However, there is limited study conducted severe form of stunting by employing Machine learning (ML) in Eastern African Countries. Therefore, our study was demonstrated to predict and identify its major determinants using ML algorithms, furthermore, to improve model explainability. Our study used Shapley Additive explanations (SHAP) and ARM to identify the determinants of severe stunting among under-five.

### Methods

cross-sectional study was conducted using DHS data from 2012–2022 in East Africa. 136,074 children were the source populations, and 76,019 children were the study population. Data were analyzed using Python version 3.7 and R version 4.3.3 for data preprocessing, modeling, and statistical analysis. Model performance was evaluated using accuracy and AUC. Furthermore, the SHAP analysis and ARM was used to further explain and interpret the determinants of severe stunting among children under five.

### Results

The Random Forest performed the best in this analysis, with an accuracy of 87% and an AUC score of 0.83. The analysis indicated that women's who do not practicing exclusive breastfeeding (SHAP value = +0.41), being from Burundi (SHAP

and reproduction in any medium, provided the original author and source are credited.

**Data availability statement:** All relevant data are within the manuscript and its [Supporting Information](#) files.

**Funding:** The author(s) received no specific funding for this work.

**Competing interests:** The authors declare that they have no conflict of interest exist.

**Abbreviations:** AUC: Area under the Curve; BMI: Body Mass Index; CI: Confidence Interval; DHS: Demographic and Health Survey; HAZ: Height for Age Z-score; KNN: K-nearest neighbor; ML: Machine Learning; RF: Random Forest; ROC: Receiving Operating Characteristics; SHAP: Shapely Additive Explanation; SSA: Sub-Saharan Africa; SVM: Support Vector Machine; SMOTE: Synthetic Minority Oversampling Techniques; UNICEF: United Nation International Children's Emergency Fund; WHO: World Health Organization; XGB: Extreme Gradient Boosting.

value = +0.04), children being underweight (SHAP value = +0.25), lived in poor household (SHAP value = +0.40), child gender being male (SHAP value = +0.23), mothers height being short (SHAP value = +0.03), mothers being underweight (SHAP value = +0.18), child size at birth being small (SHAP value = +0.21), women's being delivered in home (SHAP value = +0.07), mothers education being primary (SHAP value = +0.20), unimproved toilet (SHAP value = +0.06), distance to health facility being a big problem (SHAP value = +0.02), were associated with increase the risk of severe stunting among under five.

## Conclusion

The Random Forest was the best-performing model for predicting severe stunting in Eastern African countries. To decrease the effects of severe stunting, integrated interventions should provide support for mothers with lower socioeconomic conditions, strengthen maternal education, empower women to practice exclusive breastfeeding, encourage facility deliveries, increase access for households to sanitary facilities, provide education on personal and environmental hygiene, provide mothers with information on the importance of complementary feeding for children as well as for the mothers, and provide near health facilities for mothers and essential care services.

## Introduction

Severe stunting is a critical form of malnutrition, causing extreme growth impairment and development in children. It is mainly caused by a chronic lack of adequate dietary intake, repeated infection, and inadequate psychological stimulation, resulting in several health and developmental problems [1–3]. It results in destructive health consequences, including impaired defense against infection, growth retardation, delayed recovery from infection, poor intelligence quotient, high anxiety and depression, and increased susceptibility to disease. It also causes poor economic productivity and poor educational attainment [4–7].

According to the 2022 WHO/UNICEF/World Bank Group report, globally 148.1 million under five and 37 million children were stunted and severely stunted respectively [8]. Stunting is most prevalent in developing and low-income countries, the highest prevalence were found in Southern Asia at 20% and SSA at 30% [5,9]. In SSA, 10.5% of children were severely stunted [10]. The prevalence is higher in Eastern African Countries compared to other SSA countries, with Burundi (24.8%), Ethiopia (17%), Tanzania (11.8%), Zambia (11.7%), Mali (10.5%), Rwanda (9%), and Zimbabwe (8%) [11–13].

Based on previous studies, several factors are assumed to contribute to stunting among under five, including socio demographic/household related factors such as place of residence, breastfeeding practice, sanitation and hygiene, distance to health facilities, wealth index, educational status, media exposure, and maternity/child

related factors include maternal weight, ANC and PNC visit birth type, child sex, child size at birth, birth order, and mother's height [13–19].

Different interventions and strategies have been conducted to alleviate the burden and consequences of severe stunting. The WHO adopted a plan to reduce all forms of malnutrition in Africa by strengthening laws and food safety rules, employing financial initiatives to encourage healthier food options, and incorporating vital nutrition initiatives into healthcare delivery systems [20]. Similarly, the Africa regional nutritional strategy 2015–2020 also emphasizes overcoming severe stunting [21–23]. In addition, Sustainable Development Goals (SDGs) were conducted as goal 2.2 stated that zero hunger, which is implemented to get rid of malnutrition such as stunting and wasting among children under five years old, will be achieved by effectively providing the essential nutrition for adolescent girls, pregnant and lactating mothers, and older persons by 2030. However, according to the SDG progress reports, current efforts are insufficient to meet the global target of reducing the prevalence of malnutrition by 40% by 2025. Recent data from various reports even indicate an increase in severe stunting [7, 13, 24, 25].

Different studies were conducted on stunting and its associated factors. However, there is limited research conducted on the severe form of stunting. In addition, most of them were from health record data and hospital settings and country level, which makes it impossible to generalize findings [13, 19, 26–43]. In addition, almost all studies use traditional regression analysis to identify the risk factors, which are ideally the risk of overfitting with many predictors, inability to handle large datasets, inability to handle complex interactions like non-linear computation, and struggle with larger data [44, 45]. In contrast to this, ML algorithm can enhance the accuracy of prediction than traditional regression models [46]. ML has the ability to handle multiple datasets, complex interactions like non-linear computation, and healthcare organizations can build accurate models that can help to accurately predict and estimate to enhance patient health outcomes [47, 48]. Therefore, this study utilized ARM and SHAP analysis to identify the predictors of severe stunting from the best-performing model by using DHS data collected from 2012 to 2022 in Eastern African countries among children under five years old.

## Methods

### Data source and study setting

This study employed cross-sectional design, drawing data from the DHS collected from 2012 and 2022. This study utilized 12 Eastern African countries presented on the map (S1 Fig 1 in S1 File) namely Burundi (2017), Ethiopia (2016), Rwanda (2019), Uganda (2016), Comoros (2012), Zambia (2018), Tanzania (2022), Mozambique (2022), Madagascar (2021), Zimbabwe (2015), Kenya (2022), and Malawi (2016) (S1 Table 1 in S1 File). The data is available in the Measure DHS website <https://www.dhsprogram.com/data/>.

### Population

**Source population.** All children who lived in 12 Eastern African countries were the source population.

**Study population.** All children who lived in 12 Eastern African countries and whose mothers/caregivers were present in the household during the enumeration period were the study population.

**Inclusion and exclusion criteria.** Children under the age of five whose mother/caregivers were present in the household during the enumeration period were included in the study. Whereas, children under the age of five years with missing or incomplete records or flagged cases (outliers) were excluded from the study [49].

**Sampling method and sample size determination.** DHS uses a standardized and validated questionnaire. It used a two-stage stratified sampling technique to select representative study participants. To begin with, the Enumeration Areas (EAs) were chosen using a probability method that was aligned with the size of each area, making sure the selection was done independently in every sampling group. In the next phase, homes were selected in a systematic way. The main DHS indicators were collected in each DHS [50]. All the detailed information for the survey (such as the sampling method,

the determination of the sample size, and the data collection procedure) is available in Demographic and Health Survey reports from the Measure DHS program website <https://www.dhsprogram.com>.

Weighted 136,074 children under five were included in this study. From them 59,505 children whose caregivers/mothers were not present during the enumeration period, and 550 children with implausible or flagged cases were removed. Finally, this study used a weighted sample of 76,019 children under five years for the analysis, namely Burundi (6048), Ethiopia (8855), Rwanda (3809), Uganda (4423), Comoros (2387), Zambia (8746), Tanzania (4807), Mozambique (3733), Madagascar (5778), Zimbabwe (4957), Kenya (17327), and Malawi (5149). The detailed flowchart for the selection of study participants presented in (S1 Fig 2, and S1 Table 1 in S1 File).

## Study variables

**Outcome variable.** The outcome variable for this study was severe stunting.

**Independent variables. Maternal/household related variables:** Mother's education, Marital status, Mother's occupation, maternal-Height, maternal-BMI, household media exposure, Father's education, types of toilets, health insurance coverage, household wealth status, Source of Fuel, Family size, Sex of Household head, Time to get drinking water, Country, Distance to health facility, Place of residence.

**Child-related/maternity-related variables:** Sex of child, Age of child, Birth order, and Child size at birth, Underweight status of the child, place of Delivery, Modes of Delivery, Age at first birth, Types of birth, ANC visits during pregnancy, PNC care, exclusive breastfeeding for six months.

**Operational definition. Severe stunting** was dichotomized into a binary category based on height-for-age Z-score. Children were considered severely stunted if their Z-score  $< -3$  SD and not severely stunted if their Z-score  $\geq -3$  SD based on the WHO child growth reference standard [12].

**Maternal BMI** was categorized into three groups based on her weight relative to her height: if BMI  $< 18.5$ , labeled underweight; if BMI is between 18.5 and 24.9, labeled as normal; if BMI  $> 25$ , labeled as overweight/obese [51].

## Data quality

The DHS program employs a data file that appropriately represents the population investigated by utilizing a policy of editing and imputation to resolve such difficulties [50]. Similarly, it uses a different procedures to improve data quality. After all questionnaires had been entered, each survey was double-entered, and the two datasets were compared to ensure accuracy. Discrepancies and inconsistencies in the data were thus rectified, and certain missing values were also filled in. The particulars of quality assurance are available at <https://www.dhsprogram.com/data/> [52].

## Data management and analysis

Before doing the analysis, weight adjustments were applied to handle the complexity of sampling design and to ensure representativeness using Stata version 17 for. We adjusted the data for both the outcome and predictors using DHS sample weights (v005/1,000,000) in all descriptive analyses. This helps to correct for unequal probability of selection and to ensure a national representativeness of samples. Additionally, the data were preprocessed, missing values were managed before conducting analysis. This study used a ML approach based on Yufeng Guo's 7 steps of ML and from the frameworks of a previous study. The seven steps employed in the data management and analysis include Data collection, Data Preprocessing, Model selection, Model training, Model evaluation, Hyperparameter tuning, and Making prediction, and for this study, ML algorithms were implemented using Python version 3.7 on Jupiter notebook [53,54].

## Data collection and preprocessing

For this study, kids' data (KR) from the DHS conducted from 2012 to 2022 were utilized, which are available in the Measure DHS program website <https://www.dhsprogram.com/data/>. The first process of making data suitable for analysis

includes weight adjustments were applied to account for the complex sampling design, ensuring representativeness, data cleaning, feature engineering, Dimensionality reduction, and data splitting.

### Data cleaning

Data was extracted, recoded, and operationalized based on DHS and WHO guidelines by using STATA version 17, and multicollinearity among the independent variables was checked by using VIF (Variance Inflation Factor) values. The VIF values for each independent variable were  $<2$ , which confirms that there was no multicollinearity between variables. Missing record was impute by KNN which is effective for both categorical and continuous variables, it is flexible and suitable to handle large and complex datasets ( $>50,000$ ) [55,56]. Additionally, the KNN Imputation showing the best performance (highest Accuracy: 0.897088 and F1-Score: 0.880405), followed by MICE and Mean/Mode imputation (S1 Table 2 in S1 File).

### Feature engineering and dimensionality reduction

It is the process of generating new variables to enhance ML efficacy and improve model performance [57]. Two methods of feature engineering were used, one-hot encoding for nominal and label encoding for ordinal feature.

Dimensionality reduction (DR) is the process of reducing the attributes used to build the model for prediction. Fewer variables can lead to simpler, more efficient models with improved performance on unseen data [58]. Feature selection involves prioritize the best relevant variables for predicting the dependent variable based on their statistical relationships. To detect the best predictors of severe stunting, we used the Boruta feature importance technique [54]. Likewise, large datasets with many attributes often not important for model development, decrease accuracy and performance [59]. Non-important variables were rejected by the algorithm; and dimensionality reduction involves decreasing the number of input features to increased model efficiency, improve model performance.

### Data splitting and model selection

Data was split into training and testing sets by allocating 80% (54,111) of the data for training and 20% (15,204) of the data for testing to evaluate the model. This study employed a 10-fold CV technique to train and test data since 10-fold CV prevents data waste, and enables model to train on most characteristics and a smaller amount of data for testing. It is an efficient way to enhance model performance [60].

After the data was prepared and divided into training and testing sets, appropriate models were selected to carry out the training by considering the nature of the dependent variable and the task to be performed. Hence, the dependent variable was binary categorical, and the task was classification. The right models were chosen, such as RF (RF), Logistic Regression (LR), Decision Tree (DT), extreme gradient boosting (XGB), K-nearest neighbor (KNN), AdaBoost, support vector machine (SVM), and CatBoost performed on Python version 3.7 using Jupyter Notebook [19,26,28,58,61].

### Balancing the data

To fix the class imbalance in the dataset and make sure the minority class is well represented, synthetic samples were made to improve the minority class without overfitting or letting the majority class take over the learning process for the training sets [62,63]. Thus SMOTE was one of the several data balancing methods that are available. Hence, SMOTE was adaptable to large datasets, flexible, and robust than other methods [64].

### Model building/training and performance evaluation

After choosing the right model, the models were trained on both balanced and unbalanced data; the best predictive model was chosen after comparing the models on balanced training data. The model's performance was measured by using performance metrics such as sensitivity, specificity, accuracy (Table 1), and AUC, which were employed to illustrate how well



the models perform in terms of predicting severe stunting [65]. Our study primarily used the AUC score to compare and select the best models, since AUC is the best method, particularly for binary classification techniques [66].

As illustrated in Table 1 two by two tables, the following formula were used to calculate.

1. Accuracy =  $\frac{TP + TN}{TP + TN + FP + FN}$
2. Sensitivity =  $\frac{TP}{TP + FN}$
3. Specificity =  $\frac{TN}{TN + FP}$
4. Precision =  $\frac{TP}{TP + FP}$

Utilizing the above metrics, the study comprehensively evaluated the performance of each predictive model in terms of overall correctness, accurate positive predictions, and identification of positive instances, balanced measure, and discriminatory ability.

## Hyperparameter

A hyperparameter is an external manipulation to the model whose value must be set by the user [58]. The selected model was optimized with the best parameters by applying the Randomized search technique with 10-fold cross-validation on the specified search space with one hundred trials. Since these techniques are more efficient when we deal with complex models and larger datasets than other techniques, by using Python version 3.7 on the Jupiter notebook [67].

## Making predictions and model interpretability using SHAP

The last step of the ML process involves figure out the dependent variable by using the independent variables. Whether a child was severely stunted or not severely stunted was identified by using the best and optimized mode using Python v3.7 [68]. SHAP was an advanced model interpretation techniques which is used explain and interpret ML model. Additionally, SHAP improves the interpretability and clarifies complex models [68]. The SHAP explainer was build based on an optimized and best-achieved model to further explore the global and local explanations for the test set on Python v3.7. SHAP global explanation was the first step to explain the model. It explains the overall behavior of the model in global fashion, it includes such as summary plot and a Beeswarm plot. The summary plot visualize the mean absolute SHAP value which was considered to show impact of individual predictions on overall models output. In addition, it which shows the importance of each feature's influence on model prediction in a global fashion. Beeswarm plot showing the average impact of each characteristic and direction of the prediction, either positive or negative [68]. On the other hand, local explanations focus on interpreting individual predictions made by an ML model. SHAP provides such local interpretability by attributing each feature's contribution to a specific prediction. The model generates distinct predictions for each instance, and SHAP analysis was leverage to explain the predictions locally by dividing down how each feature contribute to the prediction. Visualization tools like waterfall plot were most commonly used to explains these local explanations, by giving directions to how each features influence either positively or negatively to the prediction based on a baseline value [69].

**Table 1. Evaluation metrics for the prediction of severe stunting in Eastern African countries, 2012–2022.**

| Classes | Predicted class |         |                   |
|---------|-----------------|---------|-------------------|
|         | Yes             | No      | Total             |
| Yes     | TN              | FP      | TN + FN           |
| No      | FN              | TP      | FN + TP           |
| Total   | TN + FN         | FP + TP | TN + FN + FP + TP |

<https://doi.org/10.1371/journal.pone.0340221.t001>

## Association rule mining

Association rule mining (ARM) was conducted based on the apriori algorithm, executed with a rules package of the R software (version 4.3.3), for the identification of specific categories of predictor variables associated with severe stunting. Association rules expressed in the form of IF–THEN rules, facilitate the detection of strong features during rule induction. Unlike statistical significance testing, ARM is interested in finding strong and frequent associations between variables by taking into account measures of interestingness that are highly correlated with the effect size of observed patterns [70].

An association rule is described as  $A \rightarrow B$ , where A (antecedent) appears on the left side of the rule and B (consequent) is on the right side. The rule indicates that the presence of A leads to being associated with the presence of B. ARM searches extensively through datasets in order to discover frequent patterns, relationships, and value associations among variables, gaining valuable insights into the complex interdependencies between the data. The result of association rule mining was presented with their lift values, a lift measures the degree to which the consequent is more likely to happen, and it provides evidence for the relationship above chance [71]. A lift of 1 indicates that A and B are independent (no relationship). A lift value greater than 1 indicates a positive relationship; the occurrence of A will make it more likely for B to occur. A lift value less than 1 indicates a negative relationship; the occurrence of A will make it less likely for B to occur [72]. The data preprocessing and analysis workflow is summarized in (S1 Fig 3 in S1 File).

## Ethical approval and consent from participants

Our study was used a secondary data from DHS after we granted permission through proper registration to access the data from the DHS website <https://www.dhsprogram.com/data/>. The data for this study was downloaded after authorization, approval and consent from the DHS committee.

## Results

### Background characteristics of participants

**Child-related/maternity-related characteristics.** A total of 76,019 children under five years were included in the study; of them, two-thirds, 45,855 (60.32%), were aged between 24 and 36 years. More than half of the children, 42,475 (55.87%), had an average size at birth. About 57,057 (75.06%) of participants were delivered to health facilities. More than half of the participants, 57,660 (75.85%), experienced their first birth at a younger age (9–21 years). About 69,284 (91.14%) of participants had vaginal delivery (Table 2).

### Maternal/household related characteristics

About 19,693 (25.25%) of participants were from non-educated mothers. More than half, 41,085 (54.05%), of participants were employed. About 56,727 (74.62%) participants resided in rural areas. Kenya has the highest representation, 17,327 (22.79%), and Comoros has the lowest, 2,387 (3.41%). More than half of participants, 40,948 (53.87%), have normal height; similarly, about 47,835 (53.87%) of mothers have normal BMI (Table 3).

### Prevalence of severe stunting among under five in Eastern African Countries

The overall prevalence of severe stunting among children under five years old in 12 Eastern African countries was 8.61% (95% CI: 8.41, 8.80). The highest rates were found in Burundi, at 23.94% (95% CI: 22.87, 25.02), followed by Ethiopia, 16.47% (95% CI: 15.69, 17.24), and the lowest prevalence was found in Kenya, 4.33% (95% CI: 4.03, 4.63). The detailed prevalence for each country is provided using a Forest Tree plot in (Fig 1). Fig 1. Forest Tree plot for the prevalence of severe stunting, in Eastern African countries from DHS 2012–2022.

**Table 2. Child-related/maternity-related characteristics for predicting severe stunting and its determinants among under-five children in Eastern African Countries, 2012–2022 (n=76019).**

| Variable                               | Categories      | Frequency | Percentage |
|----------------------------------------|-----------------|-----------|------------|
| Child's sex                            | Male            | 38176     | 50.22      |
|                                        | Female          | 37843     | 49.78      |
| Child's age                            | < 24            | 17804     | 23.42      |
|                                        | 24–36           | 45855     | 60.32      |
|                                        | 37–47           | 12087     | 15.90      |
|                                        | 48–59           | 273       | 0.36       |
| Place of delivery                      | Home            | 18962     | 24.94      |
|                                        | Health facility | 57057     | 75.06      |
| Modes of delivery                      | Cesarean        | 6735      | 8.86       |
|                                        | Vaginal         | 69284     | 91.14      |
| Types of delivery                      | Single          | 73945     | 97.27      |
|                                        | Twin            | 2074      | 2.73       |
| PNC visit                              | No              | 55935     | 73.58      |
|                                        | Yes             | 20084     | 26.42      |
| Exclusive breastfeeding for six months | No              | 43422     | 57.12      |
|                                        | Yes             | 32597     | 42.88      |
| ANC visit                              | No              | 38297     | 50.38      |
|                                        | Yes             | 37722     | 49.62      |
| Birth order                            | 1–3             | 17563     | 23.10      |
|                                        | 4–6             | 37784     | 49.70      |
|                                        | >=7             | 20672     | 27.19      |
| Child size at birth                    | Small           | 15561     | 20.47      |
|                                        | Average         | 42475     | 55.87      |
|                                        | Large           | 17983     | 23.66      |
| Underweight status of child            | Underweight     | 54377     | 71.53      |
|                                        | No underweight  | 21642     | 28.31      |

<https://doi.org/10.1371/journal.pone.0340221.t002>

## ML analysis of severe stunting

**Feature selection.** The Boruta algorithm result revealed that all the variables were colored green and presented above the shadomax. Hence, all variables were confirmed to be important by the algorithm and were used for the next analysis, as shown in (S1 Fig 4 in S1 File).

**Balancing the data.** To handle unbalanced data distributions in the training sets, the SMOTE oversampling technique generated 47,407 additional synthetic data for minority classes in the training sets. Hence, the data was changed from unbalanced to balanced distribution for both classes as shown in (Fig 2). Fig 2. Distribution of severe stunting before and after data balancing for the prediction of severe stunting Eastern African countries, 2012–2022.

**Model building/training and model performance evaluation.** Eight ML models were selected and trained to predict severe stunting accurately based on performance metrics, including AUC score, sensitivity, specificity, and accuracy. A stratified 10-fold cross-validation technique was used to compare the performances of predictive models. After comparing the models with unbalanced data, AdaBoost was the best-performing model with an accuracy of 90% and a 0.93 AUC score; however, the unbalanced nature of the outcome variables leads to distorted results. Hence, after balancing the data, RF achieves better performance than the other models with an accuracy of 87% and an AUC score of 0.83. CatBoost was the second-best-performing model with an accuracy of 84% and a 0.82 AUC score, Similarly, RF achieves



**Table 3. Maternal/household related characteristics for predicting severe stunting and its determinants among under-five children in Eastern African Countries, 2012–2022 (n = 76019).**

| Variable                   | Categories         | Frequency | Percentage |
|----------------------------|--------------------|-----------|------------|
| <b>Mother's Education</b>  | No education       | 19693     | 25.25      |
|                            | Primary            | 32949     | 43.34      |
|                            | Secondary & Higher | 6609      | 8.69       |
| <b>Marital Status</b>      | Single             | 23377     | 30.75      |
|                            | Divorced/separated | 65084     | 85.62      |
|                            | Married            | 4326      | 5.69       |
| <b>Mother's Occupation</b> | Not-working        | 34934     | 45.95      |
|                            | Working            | 41085     | 54.05      |
| <b>Father's Education</b>  | No-Education       | 17637     | 23.20      |
|                            | Primary            | 32367     | 42.58      |
|                            | Secondary & Higher | 26015     | 34.22      |
| <b>Mother's height</b>     | Short              | 26561     | 34.94      |
|                            | Normal             | 40948     | 53.87      |
|                            | Tall               | 8510      | 11.19      |
| <b>Mother's BMI</b>        | Underweight        | 13377     | 17.60      |
|                            | Normal             | 47835     | 62.93      |
|                            | Overweight         | 14807     | 19.48      |
| <b>Age at first birth</b>  | 9–21               | 57660     | 75.85      |
|                            | 22–34              | 18127     | 23.85      |
|                            | 35–47              | 232       | 0.31       |
| <b>Types of Toilets</b>    | Not improved       | 39480     | 51.93      |
|                            | Improved           | 36539     | 48         |
| <b>Wealth status</b>       | Poor               | 36163     | 47.57      |
|                            | Middle             | 14097     | 18.54      |
|                            | Rich               | 25759     | 33.8       |
| <b>Household head sex</b>  | Male               | 56990     | 74.97      |
|                            | Female             | 19029     | 25.03      |
| <b>Family size</b>         | 1-5                | 41933     | 55.16      |
|                            | 6–12               | 22993     | 30.25      |
|                            | >12                | 11093     | 14.59      |
| <b>Fuel type</b>           | Not-Electricity    | 71148     | 93.59      |
|                            | Electricity        | 4871      | 6.41       |
| <b>Insurance Coverage</b>  | No                 | 69714     | 91.71      |
|                            | Yes                | 6305      | 8.29       |
| <b>Media exposure</b>      | No                 | 30305     | 39.87      |
|                            | Yes                | 45714     | 60.13      |
| <b>Time to get water</b>   | Quick access       | 6227      | 8.19       |
|                            | Took long hour     | 67895     | 89.31      |
|                            | Far                | 1897      | 2.50       |
| <b>Country</b>             | Burundi            | 6048      | 7.96       |
|                            | Ethiopia           | 8855      | 11.65      |
|                            | Kenya              | 17327     | 22.79      |
|                            | Comoros            | 2387      | 3.14       |
|                            | Madagascar         | 5778      | 7.60       |
|                            | Malawi             | 5149      | 6.77       |
|                            | Mozambique         | 3733      | 4.91       |
|                            | Rwanda             | 3809      | 5.01       |
|                            | Tanzania           | 4809      | 6.32       |
|                            | Uganda             | 4423      | 5.82       |
|                            | Zimbabwe           | 8746      | 11.51      |
|                            | Zambia             | 4957      | 6.52       |

(Continued)

**Table 3.** (Continued)

| Variable                    | Categories        | Frequency | Percentage |
|-----------------------------|-------------------|-----------|------------|
| Residence                   | Urban             | 19292     | 25.38      |
|                             | Rural             | 56727     | 74.62      |
| Distance to health facility | A big problem     | 48091     | 63.26      |
|                             | Not a big problem | 27928     | 36.74      |

<https://doi.org/10.1371/journal.pone.0340221.t003>

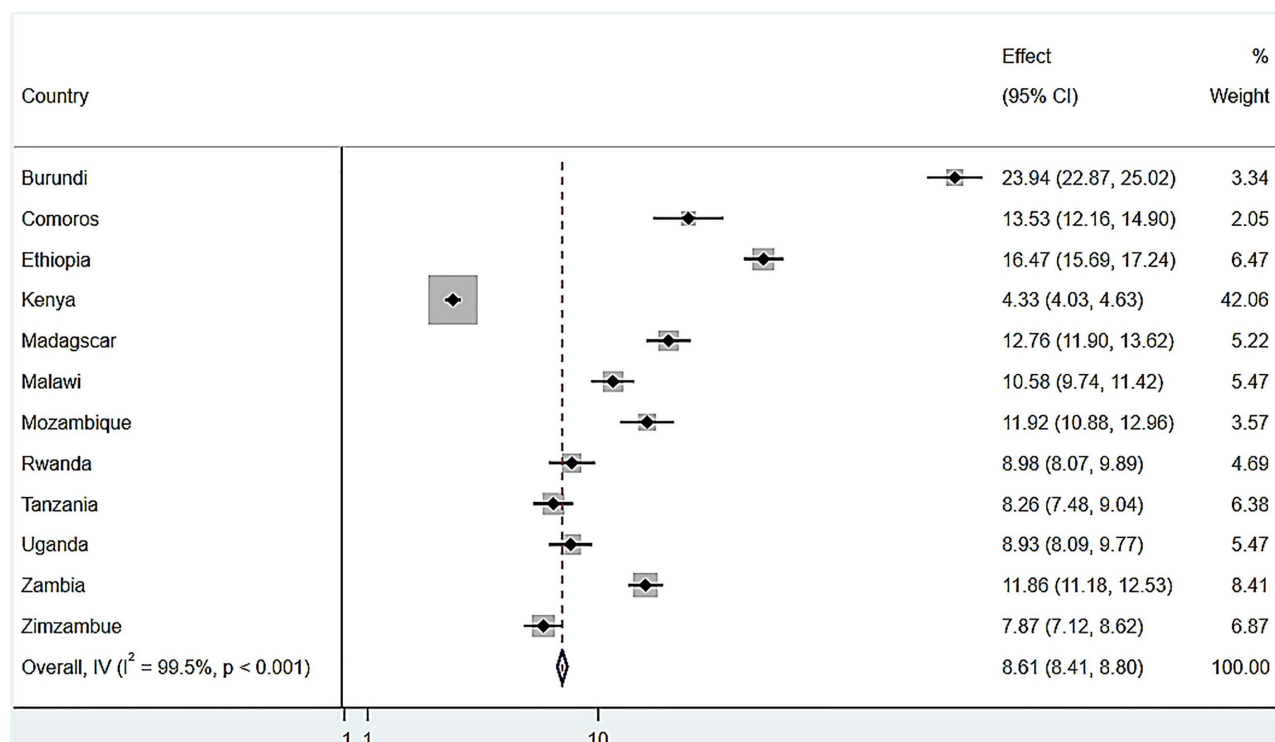

**Fig 1.** Forest plot showing the prevalence of severe stunting among under-five children in Eastern African countries using data from DHS 2012–2022.

<https://doi.org/10.1371/journal.pone.0340221.g001>

the best performance among other models with sensitivity (93%), and specificity (91%), RF also performed best in classifying cases. The performances of each model were presented in (Table 4, S1 Fig 5 in S1 File).

### Hyperparameter tuning for the RF classifier

The parameters of RF were optimized with Randomized search techniques, after optimization. The default and optimized values are provided in (Table 5).

### Predicting severe stunting using an optimized RF model

After selecting the best model, the RF model was further optimized using Randomized search, the optimized RF model was tested on 15,204 sample test data. From 1663 severely stunted cases, the model predicted 1546 cases correctly as severely stunted cases (True Positive), and from 13,541 non-severely stunted cases, the model predicted 12,242 cases

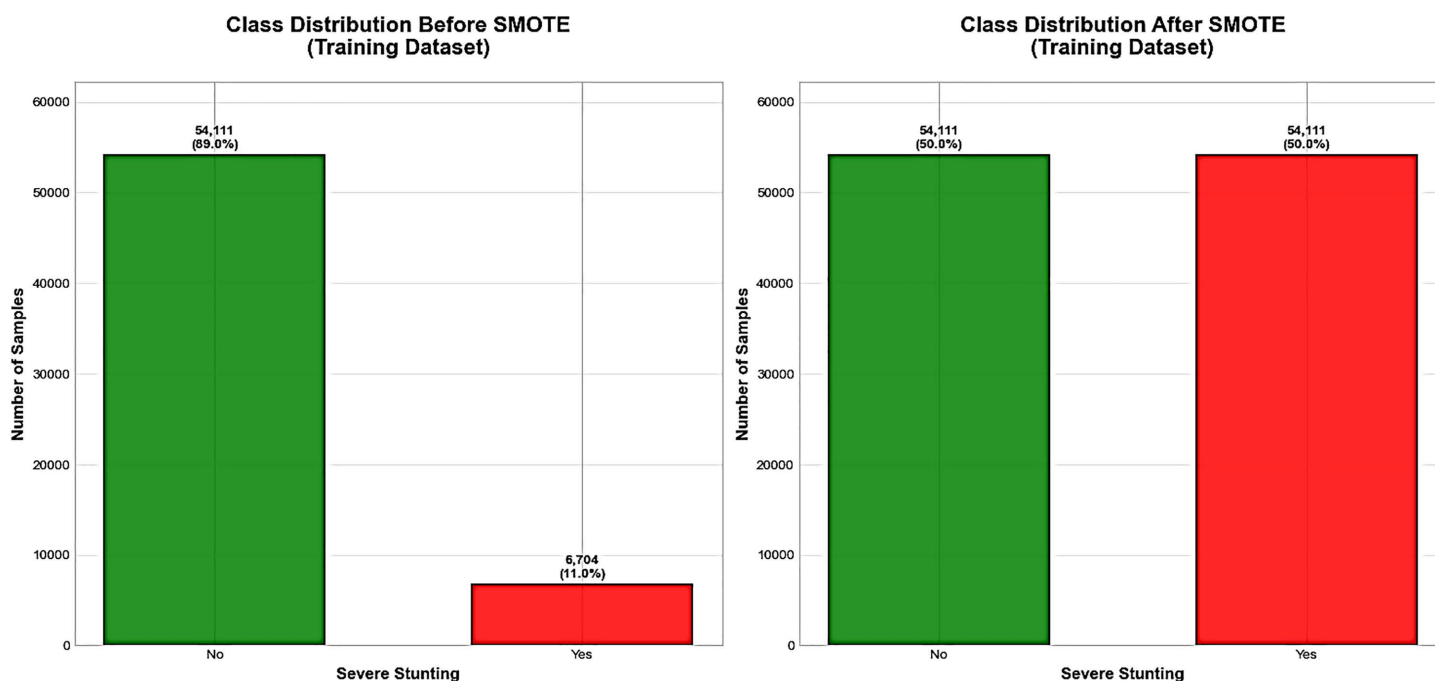

**Fig 2.** Distribution of severe stunting before and after data balancing for the prediction of severe stunting Eastern African countries, using data from DHS 2012–2022.

<https://doi.org/10.1371/journal.pone.0340221.g002>

**Table 4.** Model building and performance evaluation using accuracy and AUC scores of balanced and unbalanced training data across different ML models for predictions of severe stunting among children under five, in Eastern African countries from 2012–2022.

| No | ML Models | Data       | Accuracy score (%) | AUC score |
|----|-----------|------------|--------------------|-----------|
| 1  | SVM       | Unbalanced | 90                 | 0.76      |
|    |           | Balanced   | 89                 | 0.77      |
| 2  | DT        | Unbalanced | 84                 | 0.63      |
|    |           | Balanced   | 82                 | 0.66      |
| 3  | LR        | Unbalanced | 89                 | 0.82      |
|    |           | Balanced   | 84                 | 0.80      |
| 4  | RF        | Unbalanced | 88                 | 0.82      |
|    |           | Balanced   | 87                 | 0.83*     |
| 5  | XGB       | Unbalanced | 90                 | 0.83      |
|    |           | Balanced   | 84                 | 0.81      |
| 6  | KNN       | Unbalanced | 89                 | 0.79      |
|    |           | Balanced   | 77                 | 0.79      |
| 7  | AdaBoost  | Unbalanced | 90                 | 0.93      |
|    |           | Balanced   | 84                 | 0.81      |
| 8  | CatBoost  | Unbalanced | 90                 | 0.84      |
|    |           | Balanced   | 84                 | 0.82      |

**Hint:** \* Maximum performance, AUC – Area under the Curve, DT – Decision Tree, KNN – K-nearest neighbor, LR – Logistic Regression, RF – Random Forest, SVM – Support Vector Machine, XGB – Extreme Gradient Boosting

<https://doi.org/10.1371/journal.pone.0340221.t004>

**Table 5. Default and optimum hyperparameter values for the RF model for predictions of severe stunting among under five, in Eastern African countries, 2012–2022.**

| No | Hyperparameters  | Default value                  | Optimum value |
|----|------------------|--------------------------------|---------------|
| 1  | n_estimators     | 100                            | 375           |
| 2  | max_features     | Sqrt of the number of features | 0.77          |
| 3  | min_sample_split | 2                              | 7             |
| 4  | min_samples_leaf | 1                              | 2             |
| 5  | max_samples      | None                           | 20            |

<https://doi.org/10.1371/journal.pone.0340221.t005>

as non-stunted (True Negative). However, the model misclassified 117 non-severely stunted as severely stunted (False Positive) and 1299 severely stunted cases as not-severely stunted (False Negative), Finally, the model predicted with an accuracy of 87%, precession of 90%, sensitivity (93%), specificity (91%) on the test data as presented in (Table 6).

### Model interpretability

**RF-based feature importance.** According to the optimized RF model most significant predictors, 21 variables with higher importance for the model, were further used to identify severe stunting using SHAP. Hence, (variables above minimum importance) were included for further analysis such as underweight status of child, country, child size at birth, family size, birth order, mother's BMI, fathers education, child age, wealth status, mothers education, mother's height, distance to health facility, ANC visit, Toilet types, mothers occupation, marital status, place of delivery, age at firth birth, exclusive breastfeeding, child sex and place of residence are the most important predictors that RF model detects illustrated in (S1 Fig 6 in S1 File).

**SHAP analysis on model prediction.** SHAP global importance score for the prediction of severe stunting using an optimized RF model illustrated that the score was sorted in descending order based on impact on the model output. Variable with more mean absolute SHAP values or variables appear on top of the bar reveal the most important predictors for predicting severe stunting such as: women's who do not practicing exclusive breastfeeding, being from Burundi, children being underweight, lived in poor household, child gender being male, mothers height being short, mothers being underweight, child size at birth being small, women's being delivered in home, mothers education being primary, unimproved toilet, distance to health facility being a big problem were the top most important variables sorted in descending order from higher to lower as illustrated in (Fig 3).

Based on the result presented in the global Beeswarm plot shows that women's who do not practicing exclusive breastfeeding (SHAP value = +0.41), being from Burundi (SHAP value = +0.04), children being underweight (SHAP value = +0.25), lived in poor household (SHAP value = +0.40), child gender being male (SHAP value = +0.23), mothers height being short (SHAP value = +0.03), mothers being underweight (SHAP value = +0.18), child size at birth being small (SHAP value = +0.21), women's being delivered in home (SHAP value = +0.07), mothers education being primary (SHAP value = +0.20), unimproved toilet (SHAP value = +0.06), distance to health facility being a big problem (SHAP

**Table 6. Two-by-two table of optimized RF model for predictions of severe stunting among children under five, in Eastern African countries, 2012–2022.**

| Classes        | Predicted class       |                         |
|----------------|-----------------------|-------------------------|
|                | Positive prediction   | Negative prediction     |
| Positive class | True positive<br>1546 | False Negative<br>1299  |
| Negative class | False Positive<br>117 | True Negative<br>12,242 |

<https://doi.org/10.1371/journal.pone.0340221.t006>

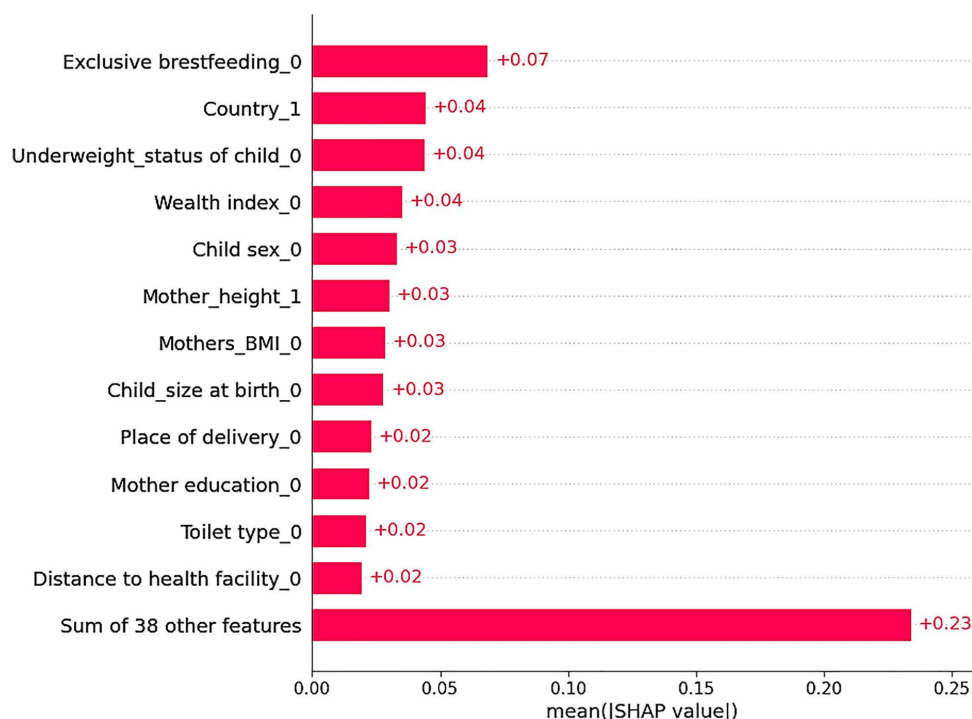

**Fig 3. SHAP global importance plot for the predictions of severe stunting among children under five in Eastern African countries, 2012–2022.** (Hint: exclusive breastfeeding\_0=who do not practicing exclusive breastfeeding, being from country\_1=Burundi, underweight status\_0=children being underweight, wealth index\_0=poor household, child sex\_0=male, mothers height\_1, mothers BMI\_0=underweight, child size at birth\_0=small, place of delivery\_0=home delivery, mothers education\_0=primary, toilet type\_0=unimproved, distance to health facility\_0=big problem.).

<https://doi.org/10.1371/journal.pone.0340221.g003>

value = +0.02), were associated with increase the risk of severe stunting among under five as illustrated in Beeswarm plot (Fig 4).

According to local SHAP plots (S1 Fig 7. in S1 File), the red colored bar pointed to the right such as: children being underweight (underweight status = 0), being from Burundi (country = 1), child gender being male (child sex = 0), being poor wealth index (wealth index = 0), unimproved toilet (toilet type = 0), mothers education being primary (mothers education = 1), fathers education being primary (fathers education = 1), mothers height being short (mothers height = 1), child size at birth being small (child size at birth = 0), mothers BMI being underweight (mothers BMI = 0), women's being delivered in home (place of delivery = 0), distance to health facility being a big problem (distance to health facility = 0), women's being lived in a family size 1–5 (family size = 0), increase the probability of severe stunting for the selected child or they are the risk, whereas the bars in blue color such as: being women's practicing exclusive breastfeeding (exclusive breastfeeding = 1), women's being utilized ANC service (ANC visit = 1), mothers who are employed (Mothers occupation = 1), child who lived in urban (place of residence = 1), child gender being female (child sex = 1) decrease the probability of severe stunting for the selected child or they are protective for severe stunting.

**Association rule mining.** Based on apriori algorithm result seven rules were strongly associated to severe stunting. The determinants are include: country (Burundi), underweight status of child (child is underweight), women's practicing exclusive breastfeeding (women's never experiencing exclusive breastfeeding), ANC visit (women's no receiving ANC services), mothers height (short maternal height), wealth status being poor, mothers education (no education and primary) were the most frequently associated factors to affect severe stunting among under five years children.



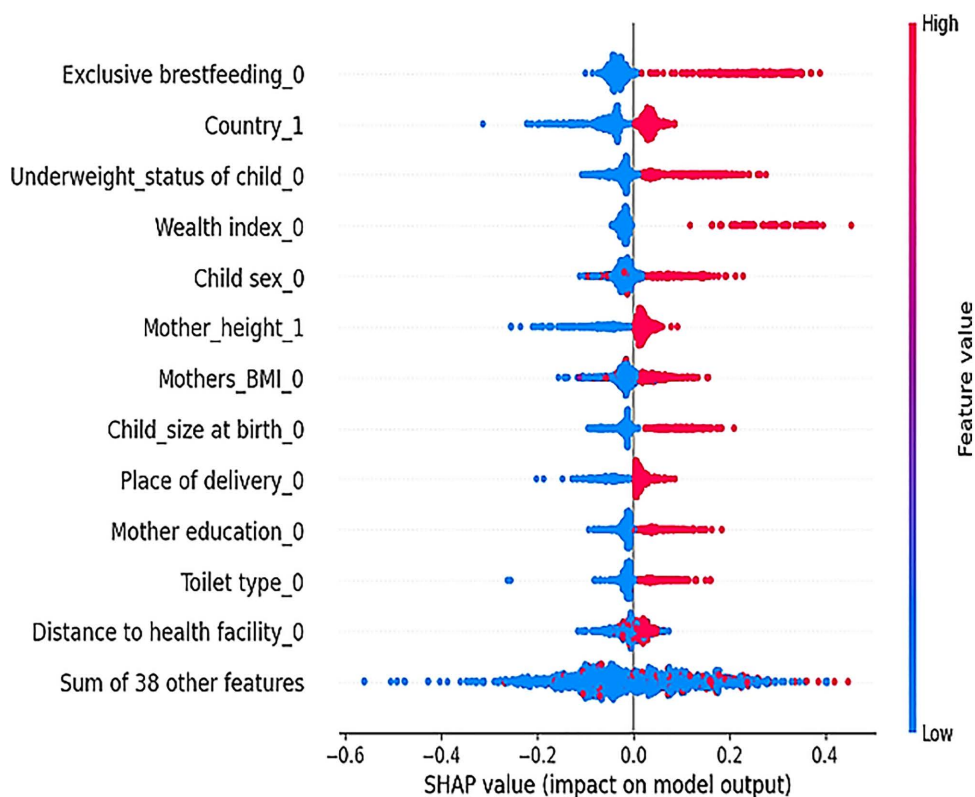

**Fig 4. Beeswarm plot for optimized RF model for the predictions of severe stunting among under five, in Eastern African countries 2012–2022.** (*Hint: exclusive breastfeeding\_0=who do not practicing exclusive breastfeeding, being from country\_1=Burundi, underweight status\_0=children being underweight, wealth index\_0=poor household, child sex\_0=male, mothers height\_1, mothers BMI\_0=underweight, child size at birth\_0=small, place of delivery\_0=home delivery, mothers education\_0=primary, toilet type\_0=unimproved, distance to health facility\_0=big problem.*).

<https://doi.org/10.1371/journal.pone.0340221.g004>

The seven-association rule based on their lift values are listed with their correspondent confidence values and their probabilities of severely stunting are listed below:

Rule 1: (lift 6.39) If country = 1 (Burundi), mother's height = 1 (short), underweight status of child = 0 (child is underweight), and mother's education = 0 (no education), then the probability of severe stunting among children increased by 6.39 times.

Rule 2: (lift 6.51) If country = 1 (Burundi), exclusive breastfeeding = 0 (mothers practicing no breastfeeding), underweight status of child = 0 (child is underweight), and mothers' education = 1 (primary), then the probability of severe stunting among children increased by 6.51 times.

Rule 3: (lift 6.4) If country = 1 (Burundi), mother's height = 1 (short), underweight status of child = 0 (child is underweight), and wealth status = 0 (being poor), then the probability of severe stunting among children increased by 6.4 times.

Rule 4: (lift 6.7) If country = 1 (Burundi), mother's height = 1 (short), underweight status of child = 0 (child is underweight), exclusive breastfeeding = 0 (mothers practicing no breastfeeding), Then the probability of severe stunting among children increased by 6.7 times.

Rule 5: (lift 6.89) If country = 1 (Burundi), wealth status = 0 (being poor), underweight status of child = 0 (child is underweight), exclusive breastfeeding = 0 (mothers practicing no breastfeeding), Then the probability of severe stunting among children increased by 6.89 times.

Rule 6: (lift 6.37) If country = 1(Burundi), ANC visit = 0 (women's not receiving no ANC visit), underweight status of child = 0(child is underweight), exclusive breastfeeding = 0(mothers practicing no breastfeeding), Then the probability of severe stunting among children increased by 6.37 times.

Rule 7: (lift 6.36) If country = 1(Burundi), place of residence = 0 (child lived in rural), underweight status of child = 0 (child is underweight), exclusive breastfeeding = 0(mothers practicing no breastfeeding), Then the probability of severe stunting among children increased by 6.36 times.

## Discussion

The overall prevalence of severe stunting among under-five children in twelve Eastern African countries was found to be 8.61% (95% CI: 8.41, 8.80). Similarly, RF model performed better than all the other models with an accuracy score of 87% and a 0.83 AUC score. Similarly, a study conducted in Zambia [26] identified RF as the best-performing model to predict stunting with an accuracy of 79% [60]. The differences in the accuracy could be due to the size of the dataset used to train the model, as the study from Zambia used 70% of the data for training, and the sample size also significantly varies. Another study conducted in East Africa [46] also identify RF as the best model with an accuracy score of 89%. The difference in accuracy possibly be due to the difference in model optimization techniques, as the previous study did not optimize the model. Similarly, a study conducted in Indonesia revealed that RF were the top utilized model for stunting prediction [49].

Optimized RF model feature importance techniques are utilized to identify variables with higher importance's for the model include: underweight status of child, country, child size at birth, family size, birth order, mother's BMI, fathers education, child age, wealth status, mothers education, mother's height, distance to health facility, ANC visit, Toilet types, mothers occupation, marital status, place of delivery, age at firth birth, exclusive breastfeeding, child sex and place of residence are the most important predictors.

The analysis demonstrated that: Mothers who do not practice exclusive breastfeeding are significantly associated with increasing the risk of severe stunting, which is supported by previous studies reported in SSA [73], Cambodia [74], the reason could be that breast milk has balanced nutrients that are building blocks for the immune system, which can reduce childhood morbidities such as diarrhea and respiratory infections [75]. Furthermore, breast milk provides an optimal infant nutrition formula by promoting antibodies and enzymes needed for development [74].

Likewise, children who lived in Burundi were associated with a higher risk of severe stunting than the other Eastern African nations, the prevalence ranged from the highest rates in Burundi at 23.94% (95% CI: 22.87, 25.02) to the lowest rates found in Kenya, at 4.33% (95% CI: 4.03, 4.63). This finding is supported by another study conducted in SSA, reported that Burundi had the highest prevalence of severe stunting among 25 countries, with a rate of 24.8% (95% CI: 18.8%–25.3%) [13].

In addition, children who are underweight are more likely to experience severe stunting. This result is supported by studies conducted in Gambia [76], and study conducted in Kenya [77] which shows children who are underweight are most likely to be stunted. Similarly a study conducted in 31 SSA gives emphasis to the fact that there is a higher coexistence between underweight, stunting, and wasting among under-fives [78]. This is because there is a positive association between being underweight and stunting, which is often associated with chronic malnutrition, which directly impacts child growth and development [79].

In addition to this, children born from poor families were associated with more severe stunting than children from rich families. This finding was similar to the study conducted in Nepal [17], East Africa [52], Ethiopia [80], which revealed that children in the poor and middle households' wealth level were more likely to be severely stunted. This is due to children who live in poor households typically having poor access to adequate nutrients, safe water, and better hygiene and sanitation. As a result, they are more vulnerable to infections and diseases such as acute respiratory diseases, diarrheal diseases, and intestinal parasites, all of which contribute to severe stunting [81].

Likewise, male children were more likely to be severely stunted than females. This result is supported by previous study findings reported in East Africa [52], SSA [73], LMIC [82]. This could be due to the lower lung maturation among males compared to females that predisposes male children to repeated respiratory infections such as pneumonia, acute respiratory infections, and other airway diseases, which could contribute to the increased risk of stunting among males [83].

As well as, being from short-stature mothers was also associated with severe stunting. This results are supported by previous studies reported in Ethiopia [84], and Kenya [85]. This might be due to the combinational and intergenerational nature of malnutrition through descendants or from families through offspring, intrauterine growth, and development defects [86].

Furthermore, children born from mothers who were underweight are more likely to experience severe stunting than children from mothers with normal body mass index (BMI). There was a similar finding conducted in Ethiopia [18,80,84]. This could be due to maternal undernutrition, which restricts uterine blood flow, impairs growth of the uterus and placenta, and results in poor growth retardation of the uterus, which results in low birth weight, impairs intrauterine growth, and causes growth retardation of the infants [87].

Moreover, children who had a small birth size were associated with severe stunting. This finding is supported by studies conducted in Rwanda [19], Gambia [76], SSA [73], Ethiopia [18], SSA [6], which state that children with low birth weight are more likely to be severely stunted than normal children. This could be due to increased susceptibility of children with low birth weight to infections, mainly diarrheal and lower respiratory infections such as pneumonia, and increased risk of complications including anemia, undernutrition, wasting and chronic lung disorders, fatigue and loss of appetite, and lower immunity to disease compared to children with normal birth weight [52,88].

Additionally, children delivered at home were more likely associated with severe stunting this results are supported by previous studies reported in East Africa, SSA, SSA [13,52,73], and Ethiopia [84], this is because if the children delivered in home there is no additional care provided to the children including post-natal care, basic immunization like iron folate which, is very crucial for the appropriate growth and development of the child as it can prevent several vaccine preventable diseases and supply the child with vital nutrients [89].

Besides, children born to mothers with a lower level of education were more likely to be severely stunted compared to children born to mothers who attained a secondary and higher level of education. It is consistent with the study findings in East Africa [52], Ethiopia [80], SSA [6,73], It could be educated mothers have good knowledge about child health and basic health care services, and an enhanced capacity to recognize childhood illness and seek treatment for their children [90].

Additionally, unimproved toilet facilities were significantly associated with severe stunting, which is supported by studies reported in Ethiopia [38], Indonesia [91], India [92]. Toilets with good sanitation prevent severe stunting by increasing hygienic and environmental friendly way to reducing a number of reservoir for infectious agent, which ultimately decreasing child suitability to infectious pathogens [93].

Lastly, as the distance to healthcare facilities increases, the risk of severe stunting also increases. This finding is supported by a study conducted in Pakistan [33], Ethiopia [94]. This could be because distance to health facility is a barrier that causes the women not to take vital maternal and child care services for addressing the health needs of the children, including PNC visit and ANC visits, basic immunization services [95].

## Strengths and limitations

We used SHAP model interpretability tools, which show how each feature affects the model's predictions. This approach improves transparency compared to traditional black-box ML models like RF. Furthermore, model was tuned to- the best parameters to boost predictive ability. In addition, we used international and standard, scale to measure severe stunting, with the guidelines of WHO to enabled compare, and contrast of findings with different studies. However, the use of SMOTE may limit the findings' applicability to real-world population distributions because the oversampling techniques used to balance the dataset may introduce analytical constraints for the uncommon outcome of severe stunting.

Additionally, the data collected from DHS over a different period interval (2012–2022) also mask important temporal heterogeneities, and the cross-sectional nature of the study design does not show the temporal sequence of the relationship between the variables (cause-and-effect), long term effects or time-specific events such as policy interventions, changes in economics or climate hazards, and public health measures that can affect the prevalence of stunting.

Finally, the secondary nature of the dataset makes it difficult to obtain and analyze more additional necessary variables, due to the absence of detailed dietary diversity and micronutrient intake data in the DHS dataset, which limits our nutritional insights. Furthermore, DHS lacks dietary covariates, preventing analysis of micronutrient deficiencies, including iron, zinc, and vitamin A, which are known drivers of stunting. The absence of nutritional covariates precludes any analysis of micronutrient deficiencies. Therefore, we recommend future research would benefit from longitudinal designs to track causal pathways, incorporation of dietary assessment tools, and validation of ML models on datasets to enhance clinical applicability.

## Conclusion

In our study, demonstrated that RF was the best model to predict severe stunting all the other models, achieved an accuracy and an AUC of 87% and 0.83 respectively. In addition, factors such as women who do not experience breastfeeding, underweight children, children who lived in in Burundi, Children with poor households, Children lived in house with unimproved toilets, mothers being uneducated, child gender being male, mothers short stature, Child born being small, mothers being underweight, home delivery, distance to health facilities being long were significantly associated with increasing the risk of severe stunting among children. To decrease the effects of severe stunting, integrated interventions should provide support for mothers with lower socioeconomic conditions, strengthen maternal education, empower women to practice exclusive breastfeeding, encourage facility deliveries, increase access for households to sanitary facilities, provide education on personal and environmental hygiene, provide mothers with information on the importance of complementary feeding for children as well as for the mothers, and provide near health facilities for mothers and essential care services.

## Implications of the study

The findings of this study carry significant implications for public health policy and nutritional intervention strategies in Eastern Africa. The identification of multiple modifiable risk factors including non-exclusive breastfeeding practices, maternal undernutrition, unimproved sanitation facilities, and limited healthcare access provides a clear roadmap for targeted interventions. Programs should prioritize the first 1,000 days of life, focusing on improving maternal nutrition and ANC care, promoting exclusive breastfeeding practices, and enhancing household sanitation infrastructure. The substantial regional disparities in Burundi underscore the urgent need for context-specific approaches that address unique socioeconomic and healthcare system challenges within the country. Furthermore, the study highlights the critical importance for healthcare systems to integrate nutritional supplements with maternal and child health services, particularly targeting disadvantaged populations through community-based outreach programs. Educational initiatives should focus on improving health literacy, while economic policies should address healthcare accessibility to remote areas.

## Supporting information

**S1 File. Supporting information containing supplementary tables (S1 Tables 1 and 2) and figures (S1 Figs 1–8) that provide additional methodological details, and supporting analyses for the study.**  
(DOCX)

## Acknowledgments

The authors are grateful to all the data curation, supervisor, study participants, and Wollo University for their creditable contributions to the success of this study. The authors would also like to thank the Measure of DHS program committee for authorizing the use of the datasets.

## Author contributions

**Conceptualization:** Halid Worku Jemil, Altaseb Beyene Kassaw, Kassahun Dessie Gashu.

**Data curation:** Halid Worku Jemil, Sonia Worku Semayneh.

**Formal analysis:** Halid Worku Jemil.

**Funding acquisition:** Halid Worku Jemil.

**Investigation:** Sonia Worku Semayneh, Kassahun Dessie Gashu.

**Methodology:** Halid Worku Jemil, Altaseb Beyene Kassaw, Kassahun Dessie Gashu.

**Project administration:** Halid Worku Jemil, Sonia Worku Semayneh.

**Software:** Halid Worku Jemil, Altaseb Beyene Kassaw.

**Validation:** Halid Worku Jemil.

**Visualization:** Halid Worku Jemil.

**Writing – original draft:** Halid Worku Jemil, Altaseb Beyene Kassaw.

**Writing – review & editing:** Halid Worku Jemil, Sonia Worku Semayneh, Altaseb Beyene Kassaw, Kassahun Dessie Gashu.

## References

1. de Onis M, Branca F. Childhood stunting: a global perspective. *Matern Child Nutr.* 2016;12 Suppl 1(Suppl 1):12–26. <https://doi.org/10.1111/mcn.12231> PMID: [27187907](https://pubmed.ncbi.nlm.nih.gov/27187907/)
2. Chanyarungrojn PA, Lelijveld N, Crampin A, Nkhwazi L, Geis S, Nyirenda M, et al. Tools for assessing child and adolescent stunting: lookup tables, growth charts and a novel appropriate-technology “MEIRU” wallchart - a diagnostic accuracy study. *PLOS Glob Public Health.* 2023;3(7):e0001592. <https://doi.org/10.1371/journal.pgph.0001592> PMID: [37450437](https://pubmed.ncbi.nlm.nih.gov/37450437/)
3. Organization WH. Global nutrition targets 2025: policy brief series. 2024.
4. United Nations Children's Fund (UNICEF), WHOW, World Bank. The UNICEF-WHO-World Bank Joint Child Malnutrition Estimates (JME) standard methodology: tracking progress on SDG indicators 2.2.1 on stunting, 2.2.2 (1) on overweight and 2.2.2 (2) on wasting. 2024.
5. Vaivada T, Akseer N, Akseer S, Somaskandan A, Stefopoulos M, Bhutta ZA. Stunting in childhood: an overview of global burden, trends, determinants, and drivers of decline. *Am J Clin Nutr.* 2020;112(Suppl 2):777S–791S. <https://doi.org/10.1093/ajcn/nqaa159> PMID: [32860401](https://pubmed.ncbi.nlm.nih.gov/32860401/)
6. Akombi BJ, Agho KE, Hall JJ, Wali N, Renzaho AMN, Merom D. Stunting, wasting and underweight in sub-Saharan Africa: a systematic review. *Int J Environ Res Public Health.* 2017;14(8).
7. Organization WH. Comprehensive implementation plan on maternal, infant and young child nutrition. 2012.
8. UNICEF. The state of the world's children 2019. 2019.
9. Adeyeye SAO, Ashaolu TJ, Bolaji OT, Abegunde TA, Omoyajowo AO. Africa and the Nexus of poverty, malnutrition and diseases. *Crit Rev Food Sci Nutr.* 2023;63(5):641–56. <https://doi.org/10.1080/10408398.2021.1952160> PMID: [34259104](https://pubmed.ncbi.nlm.nih.gov/34259104/)
10. Prendergast AJ, Humphrey JH. The stunting syndrome in developing countries. *Paediatr Int Child Health.* 2014;34(4):250–65. <https://doi.org/10.1179/2046905514Y.0000000158> PMID: [25310000](https://pubmed.ncbi.nlm.nih.gov/25310000/)
11. Bloss E, Wainaina F, Bailey RC. Prevalence and predictors of underweight, stunting, and wasting among children aged 5 and under in western Kenya. *J Trop Pediatr.* 2004;50(5):260–70. <https://doi.org/10.1093/tropej/50.5.260> PMID: [15510756](https://pubmed.ncbi.nlm.nih.gov/15510756/)
12. Group UWWB, Estimates JCM. Levels and trends in child malnutrition. 2021.
13. Ahmed KY, Dadi AF, Ogbo FA, Page A, Agho KE, Akalu TY, et al. Population-modifiable risk factors associated with childhood stunting in Sub-Saharan Africa. *JAMA Netw Open.* 2023;6(10):e2338321. <https://doi.org/10.1001/jamanetworkopen.2023.38321> PMID: [37851439](https://pubmed.ncbi.nlm.nih.gov/37851439/)
14. Deshmukh PR, Sinha N, Dongre AR. Social determinants of stunting in rural area of Wardha, Central India. *Med J Armed Forces India.* 2013;69(3):213–7. <https://doi.org/10.1016/j.mjafi.2012.10.004> PMID: [24600112](https://pubmed.ncbi.nlm.nih.gov/24600112/)
15. Aguayo VM, Nair R, Badgaiyan N, Krishna V. Determinants of stunting and poor linear growth in children under 2 years of age in India: an in-depth analysis of Maharashtra's comprehensive nutrition survey. *Matern Child Nutr.* 2016;12 Suppl 1(Suppl 1):121–40. <https://doi.org/10.1111/mcn.12259> PMID: [27187911](https://pubmed.ncbi.nlm.nih.gov/27187911/)
16. Torlesse H, Cronin AA, Sebayang SK, Nandy R. Determinants of stunting in Indonesian children: evidence from a cross-sectional survey indicate a prominent role for the water, sanitation and hygiene sector in stunting reduction. *BMC Public Health.* 2016;16:669. <https://doi.org/10.1186/s12889-016-3339-8> PMID: [27472935](https://pubmed.ncbi.nlm.nih.gov/27472935/)



17. Tiwari R, Ausman LM, Agho KE. Determinants of stunting and severe stunting among under-fives: evidence from the 2011 Nepal demographic and health survey. *BMC Pediatr*. 2014;14:239. <https://doi.org/10.1186/1471-2431-14-239> PMID: [25262003](#)
18. Berhe K, Seid O, Gebremariam Y, Berhe A, Etsay N. Risk factors of stunting (chronic undernutrition) of children aged 6 to 24 months in Mekelle City, Tigray Region, North Ethiopia: an unmatched case-control study. *PLoS One*. 2019;14(6):e0217736. <https://doi.org/10.1371/journal.pone.0217736> PMID: [31181094](#)
19. Ndagijimana S, Kabano IH, Masabo E, Ntaganda JM. Prediction of stunting among under-5 children in rwanda using machine learning techniques. *J Prev Med Public Health*. 2023;56(1):41–9. <https://doi.org/10.3961/jpmph.22.388> PMID: [36746421](#)
20. Organization WH. The Work of WHO in the African Region - Report of the Regional Director: 2017-2018. World Health Organization; 2018. <https://www.who.int/publications/i/item/9789241514563>
21. Lokosang L, Osei A, Covic N. The African union policy environment toward enabling action for nutrition in Africa. 2016.
22. Union A. Africa health strategy 2016–2030. Addis Ababa: African Union; 2016.
23. Haddad LJ, Ag Bendeche M, Bhatia K, Eriksen K, Jallow I, Ledlie N. Africa's progress toward meeting current nutrition targets. 2016.
24. FAO. The state of food security and nutrition in the World 2024 – financing to end hunger, food insecurity and malnutrition in all its forms. 2024.
25. Zerrudo MRA. Goal 2: Zero hunger. Transforming tourism. 2017.
26. Chilyabanyama ON, Chilengi R, Simuyandi M, Chisenga CC, Chirwa M, Hamusonde K, et al. Performance of machine learning classifiers in classifying stunting among under-five children in Zambia. *Children (Basel)*. 2022;9(7):1082. <https://doi.org/10.3390/children9071082> PMID: [35884066](#)
27. Vu NU. Childhood stunting prediction in Bangladesh a ML approach. Tilburg University; 2022.
28. Sara SS, Khan MS, Talukder A. Prediction of child stunting with ML algorithms: a cross-country study of Bangladesh, India, and Nepal. 2024.
29. Fannany C, Gunawan PH, Aquarini N. ML classification analysis for proactive prevention of child stunting in Bojongsoang: a comparative study. In: 2024 International conference on data science and its applications (ICoDSA). IEEE; 2024.
30. Febriani ADB, Daud D, Rauf S, Nawing HD, Ganda IJ, Salekede SB, et al. Risk factors and nutritional profiles associated with stunting in children. *Pediatr Gastroenterol Hepatol Nutr*. 2020;23(5):457–63. <https://doi.org/10.5223/pghn.2020.23.5.457> PMID: [32953641](#)
31. Kofinti RE, Koomson I, Paintsil JA, Ameyaw EK. Reducing children's malnutrition by increasing mothers' health insurance coverage: A focus on stunting and underweight across 32 sub-Saharan African countries. *Economic Modelling*. 2022;117:106049. <https://doi.org/10.1016/j.econmod.2022.106049>
32. Laksono AD, Wulandari RD, Amaliah N, Wisnuwardani RW. Stunting among children under two years in Indonesia: does maternal education matter?. *PLoS One*. 2022;17(7):e0271509. <https://doi.org/10.1371/journal.pone.0271509> PMID: [35877770](#)
33. Shahid M, Ameer W, Malik NI, Alam MB, Ahmed F, Qureshi MG, et al. Distance to Healthcare Facility and Lady Health Workers' Visits Reduce Malnutrition in under Five Children: A Case Study of a Disadvantaged Rural District in Pakistan. *Int J Environ Res Public Health*. 2022;19(13):8200. <https://doi.org/10.3390/ijerph19138200> PMID: [35805858](#)
34. Kumar S, Patel R, Chauhan S. Does land possession among working women empower them and improve their child health: a study based on National Family Health Survey-4. *Child Youth Serv Rev*. 2020;119:105697. <https://doi.org/10.1016/j.childyouth.2020.105697>
35. Upadhyay AK, Srivastava S, Mishra V. Does use of solid fuels for cooking contribute to childhood stunting? a longitudinal data analysis from low- and middle-income countries. *J Biosoc Sci*. 2021;53(1):121–36. <https://doi.org/10.1017/S0021932020000097> PMID: [32122418](#)
36. Semba RD, de Pee S, Sun K, Sari M, Akhter N, Bloem MW. Effect of parental formal education on risk of child stunting in Indonesia and Bangladesh: a cross-sectional study. *Lancet*. 2008;371(9609):322–8. [https://doi.org/10.1016/S0140-6736\(08\)60169-5](https://doi.org/10.1016/S0140-6736(08)60169-5) PMID: [18294999](#)
37. Sassi M. Evidence of between- and within-household child nutrition inequality in Malawi: does the gender of the household head matter?. *Eur J Dev Res*. 2019;32(1):28–50. <https://doi.org/10.1057/s41287-019-00220-8>
38. Regassa R, Belachew T, Duguma M, Tamiru D. Factors associated with stunting in under-five children with environmental enteropathy in slum areas of Jimma town, Ethiopia. *Front Nutr*. 2024;11:1335961. <https://doi.org/10.3389/fnut.2024.1335961> PMID: [38650636](#)
39. Nshakira-Rukundo E, Mussa EC, Gerber N, von Braun J. Impact of voluntary community-based health insurance on child stunting: evidence from rural Uganda. *Soc Sci Med*. 2020;245:112738. <https://doi.org/10.1016/j.socscimed.2019.112738> PMID: [31855728](#)
40. Rah JH, Sukotjo S, Badgaiyan N, Cronin AA, Torlesse H. Improved sanitation is associated with reduced child stunting amongst Indonesian children under 3 years of age. *Matern Child Nutr*. 2020;16 Suppl 2(Suppl 2):e12741. <https://doi.org/10.1111/mcn.12741> PMID: [32835453](#)
41. Rahayuwati L, Komariah M, Sari CWM, Yani DI, Hermayanti Y, Setiawan A, et al. The influence of mother's employment, family income, and expenditure on stunting among children under five: a cross-sectional study in Indonesia. *J Multidiscip Healthc*. 2023;16:2271–8. <https://doi.org/10.2147/JMDH.S417749> PMID: [37601326](#)
42. Jakaria M, Bakshi RK, Hasan MM. Is maternal employment detrimental to children's nutritional status? Evidence from Bangladesh. *Rev Develop Econ*. 2021;26(1):85–111. <https://doi.org/10.1111/rode.12819>
43. Amadu I, Seidu AA, Duku E, Okyere J, Hagan JE, Hormenu T. The joint effect of maternal marital status and type of household cooking fuel on child nutritional status in sub-Saharan Africa: analysis of cross-sectional surveys on children from 31 countries. *Nutrients*. 2021;13(5).
44. Singal AG, Mukherjee A, Elmunzer BJ, Higgins PDR, Lok AS, Zhu J, et al. Machine learning algorithms outperform conventional regression models in predicting development of hepatocellular carcinoma. *Am J Gastroenterol*. 2013;108(11):1723–30. <https://doi.org/10.1038/ajg.2013.332> PMID: [24169273](#)

45. Christodoulou E, Ma J, Collins GS, Steyerberg EW, Verbakel JY, Van Calster B. A systematic review shows no performance benefit of machine learning over logistic regression for clinical prediction models. *J Clin Epidemiol*. 2019;110:12–22. <https://doi.org/10.1016/j.jclinepi.2019.02.004> PMID: [30763612](#)
46. Yehuala TZ, Derseh NM, Tewelgne MF, Wubante SM. Exploring ML algorithms to predict diarrhea disease and identify its determinants among under-five years children in East Africa. *J Epidemiol Global Health*. 2024;14(3):1089–99.
47. Badawy M, Ramadan N, Hefny HA. Healthcare predictive analytics using machine learning and deep learning techniques: a survey. *J Electrical Syst Inf Technol*. 2023;10(1). <https://doi.org/10.1186/s43067-023-00108-y>
48. Mateen BA, Liley J, Denniston AK, Holmes CC, Vollmer SJ. Improving the quality of machine learning in health applications and clinical research. *Nat Mach Intell*. 2020;2(10):554–6. <https://doi.org/10.1038/s42256-020-00239-1>
49. Rahutomo RAE, Natanael G, Isnani M, Asadi F, Pardamean B. WHO child g. In: *Nutrition and Food Safety*. 2023:229–334.
50. Croft TN, Marshall AM, Allen CK, Arnold F, Assaf S, Balian S. *Guide to DHS statistics*. Rockville: ICF. 2018.
51. WHO. BMI classification for adults. 2006.
52. Tesema GA, Yeshaw Y, Worku MG, Tessema ZT, Teshale AB. Pooled prevalence and associated factors of chronic undernutrition among under-five children in East Africa: A multilevel analysis. *PLoS One*. 2021;16(3):e0248637. <https://doi.org/10.1371/journal.pone.0248637> PMID: [33765094](#)
53. Y G. *The 7 steps of ML*. 2017.
54. Rawat S, Rawat A, Kumar D, Sabitha AS. Application of machine learning and data visualization techniques for decision support in the insurance sector. *Inter J Inform Manag Data Insights*. 2021;1(2):100012. <https://doi.org/10.1016/j.jiime.2021.100012>
55. Li J, Guo S, Ma R, He J, Zhang X, Rui D, et al. Comparison of the effects of imputation methods for missing data in predictive modelling of cohort study datasets. *BMC Med Res Methodol*. 2024;24(1):41. <https://doi.org/10.1186/s12874-024-02173-x> PMID: [38365610](#)
56. Beretta L, Santaniello A. Nearest neighbor imputation algorithms: a critical evaluation. *BMC Medical Inform Decision Mak*. 2016;16(3):74.
57. Mork H. Eleventh international conference on the bearing capacity of roads. 2022.
58. Brownlee J. *Data preparation for ML: data cleaning, feature selection, and data transforms in Python*. ML Mastery; 2020.
59. Ogallo W, Speakman S, Akinwande V, Varshney KR, Walcott-Bryant A, Wayua C, et al. Identifying factors associated with neonatal mortality in Sub-Saharan Africa using Machine Learning. *AMIA Annu Symp Proc*. 2021;2020:963–72. PMID: [33936472](#)
60. WHO. WHO child growth standards: length/height-for-age, weight-for-age, weight-for-length, weight-for-height and body mass index-for-age: methods and development. 2025.
61. Chen JH, Asch SM. Machine learning and prediction in medicine - beyond the peak of inflated expectations. *N Engl J Med*. 2017;376(26):2507–9. <https://doi.org/10.1056/NEJMp1702071> PMID: [28657867](#)
62. Alkhalwaldeh IM, Albalkhi I, Naswhan AJ. Challenges and limitations of synthetic minority oversampling techniques in machine learning. *World J Methodol*. 2023;13(5):373–8. <https://doi.org/10.5662/wjm.v13.i5.373> PMID: [38229946](#)
63. Gnip P, Vokorokos L, Drotár P. Selective oversampling approach for strongly imbalanced data. *PeerJ Comput Sci*. 2021;7:e604. <https://doi.org/10.7717/peerj-cs.604> PMID: [34239981](#)
64. Wang S, Dai Y, Shen J, Xuan J. Research on expansion and classification of imbalanced data based on SMOTE algorithm. *Sci Rep*. 2021;11(1):24039. <https://doi.org/10.1038/s41598-021-03430-5> PMID: [34912009](#)
65. Kuhn M. *Applied predictive modeling*. Springer; 2013.
66. Richardson E, Trevizani R, Greenbaum JA, Carter H, Nielsen M, Peters B. The receiver operating characteristic curve accurately assesses imbalanced datasets. *Patterns (N Y)*. 2024;5(6):100994. <https://doi.org/10.1016/j.patter.2024.100994> PMID: [39005487](#)
67. Caponetto G. Random search vs grid search for hyperparameter optimization. 2019.
68. Iftikhar A, Attia Bari FZ, Jabeen U, Masood Q, Waheed A. Maternal anemia and its impact on nutritional status of children under the age of two years. *Biomedical J*. 2018;2(4):1–4.
69. Abu-Ouf NM, Jan MM. The impact of maternal iron deficiency and iron deficiency anemia on child's health. *Saudi Med J*. 2015;36(2):146–9. <https://doi.org/10.15537/smj.2015.2.10289> PMID: [25719576](#)
70. Aditya A. Association rule mining explained with examples. <https://codinginfinite.com/association-rule-mining-explained-with-examples/>
71. Zhao Q, Bhowmick SS. *Association rule mining: a survey*. Nanyang Technological University, Singapore. 2003;135:18.
72. SHAP: a comprehensive guide to SHapley Additive exPlanations. Accessed 2025 June. <https://www.geeksforgeeks.org/machine-learning/shap-a-comprehensive-guide-to-shapley-additive-explanations/>
73. Takele BA, Gezie LD, Alamneh TS. Pooled prevalence of stunting and associated factors among children aged 6–59 months in Sub-Saharan Africa countries: A Bayesian multilevel approach. *PLoS One*. 2022;17(10):e0275889. <https://doi.org/10.1371/journal.pone.0275889> PMID: [36228030](#)
74. Harvey CM, Newell M-L, Padmadas S. Maternal socioeconomic status and infant feeding practices underlying pathways to child stunting in Cambodia: structural path analysis using cross-sectional population data. *BMJ Open*. 2022;12(11):e055853. <https://doi.org/10.1136/bmjopen-2021-055853> PMID: [36328394](#)
75. Horta BL, Victora CG. *Long-term effects of breastfeeding*. Geneva: World Health Organization; 2013.

76. Asmare AA, Agmas YA. Determinants of coexistence of stunting, wasting, and underweight among children under five years in the Gambia; evidence from 2019/20 Gambian demographic health survey: application of multivariate binary logistic regression model. *BMC Public Health*. 2022;22(1):1621. <https://doi.org/10.1186/s12889-022-14000-3> PMID: 36028850
77. Wambua M, Kariuki SM, Abdullahi H, Abdullahi OA, Ngari MM. Wasting coexisting with underweight and stunting among children aged 6–59 months hospitalised in Garissa County Referral Hospital, Kenya. *Matern Child Nutr*. 2025;21(1):e13754. <https://doi.org/10.1111/mcn.13754> PMID: 39449066
78. Amadu I, Seidu A-A, Duku E, Boadu Frimpong J, Hagan Jnr JE, Aboagye RG, et al. Risk factors associated with the coexistence of stunting, underweight, and wasting in children under 5 from 31 sub-Saharan African countries. *BMJ Open*. 2021;11(12):e052267. <https://doi.org/10.1136/bmjopen-2021-052267> PMID: 34930735
79. Bhadra D. Spatial variation and risk factors of the dual burden of childhood stunting and underweight in India: a copula geosadditive modelling approach. *J Nutr Sci*. 2024;13:e52. <https://doi.org/10.1017/jns.2024.49> PMID: 39345249
80. Kassaw A, Kassie YT, Kefale D, Azmeraw M, Arage G, Asferi WN, et al. Pooled prevalence and its determinants of stunting among children during their critical period in Ethiopia: A systematic review and meta-analysis. *PLoS One*. 2023;18(11):e0294689. <https://doi.org/10.1371/journal.pone.0294689> PMID: 38019780
81. Kikafunda JK, Walker AF, Collett D, Tumwine JK. Risk factors for early childhood malnutrition in Uganda. *Pediatrics*. 1998;102(4):E45. <https://doi.org/10.1542/peds.102.4.e45> PMID: 9755282
82. Ssentongo P, Ssentongo AE, Ba DM, Ericson JE, Na M, Gao X. Global, regional and national epidemiology and prevalence of child stunting, wasting and underweight in low- and middle-income countries, 2006–2018. *Scient Rep*. 2021;11(1):5204.
83. Vu HD, Dickinson C, Kandasamy Y. Sex difference in mortality for premature and low birth weight neonates: a systematic review. *Am J Perinatol*. 2018;35(8):707–15. <https://doi.org/10.1055/s-0037-1608876> PMID: 29241280
84. Amaha ND, Woldeamanuel BT. Maternal factors associated with moderate and severe stunting in Ethiopian children: analysis of some environmental factors based on 2016 demographic health survey. *Nutr J*. 2021;20(1):18. <https://doi.org/10.1186/s12937-021-00677-6> PMID: 33639943
85. McGrath CJ, Nduati R, Richardson BA, Kristal AR, Mbori-Ngacha D, Farquhar C, et al. The prevalence of stunting is high in HIV-1-exposed uninfected infants in Kenya. *J Nutr*. 2012;142(4):757–63. <https://doi.org/10.3945/jn.111.148874> PMID: 22378334
86. Subramanian SV, Ackerson LK, Davey Smith G, John NA. Association of maternal height with child mortality, anthropometric failure, and anemia in India. *JAMA*. 2009;301(16):1691–701. <https://doi.org/10.1001/jama.2009.548> PMID: 19383960
87. Dewey KG, Begum K. Long-term consequences of stunting in early life. *Matern Child Nutr*. 2011;7 Suppl 3(Suppl 3):5–18. <https://doi.org/10.1111/j.1740-8709.2011.00349.x> PMID: 21929633
88. Mukhopadhyay K, Mahajan R, Louis D, Narang A. Longitudinal growth of very low birth weight neonates during first year of life and risk factors for malnutrition in a developing country. *Acta Paediatr*. 2013;102(3):278–81. <https://doi.org/10.1111/apa.12113> PMID: 23205735
89. Stunting: and what it is and what it means. 2019.
90. Khattak AM, Gul S, Muntaha ST. Evaluation of nutritional knowledge of mothers about their children. *Gomal J Med Sci*. 2007;5(1).
91. Ahmadi LS, Azizah R, Oktarizal H. Association between toilet availability and handwashing habits and the incidence of stunting in young children in Tanjung Pinang City, Indonesia. *Indones Malays J Med Heal Sci*. 2020;16(2):215–8.
92. Lee C, Lakhanpaul M, Stern BM, Sarkar K, Parikh P. Associations between the household environment and stunted child growth in rural India: a cross-sectional analysis. *UCL Open Environ*. 2021;3:e014. <https://doi.org/10.14324/111.444/ucloe.000014> PMID: 37228801
93. Jain A, O Pitchik H, Harrison C, Kim R, Subramanian SV. The Association between anthropometric failure and toilet types: a cross-sectional study from India. *Am J Trop Med Hyg*. 2023;108(4):811–9. <https://doi.org/10.4269/ajtmh.22-0138> PMID: 36780894
94. Desalegn M, Kifle W, Birtukan T, Amanuel T. Treatment outcome of severe acute malnutrition and determinants of survival in Northern Ethiopia: a prospective cohort study. *Int J Nutr Metab*. 2016;8(3):12–23. <https://doi.org/10.5897/ijnam2015.0193>
95. Pembe AB, Carlstedt A, Urassa DP, Lindmark G, Nyström L, Darj E. Quality of antenatal care in rural Tanzania: counselling on pregnancy danger signs. *BMC Preg Childbirth*. 2010;10:35. <https://doi.org/10.1186/1471-2393-10-35> PMID: 20594341
